# Supplementary material
Source: publisher figshare collection journal article supplement (https://asha.figshare.com/articles/dataset/_/6484001)

**Supplemental Material S3.** Spectrograms of the second syllable from two tokens of *getaucht* (“dived”) with (left) and without (right) a stretch of breathy voice following voice onset time (VOT). The breathy voiced stretch is annotated with VOT+.

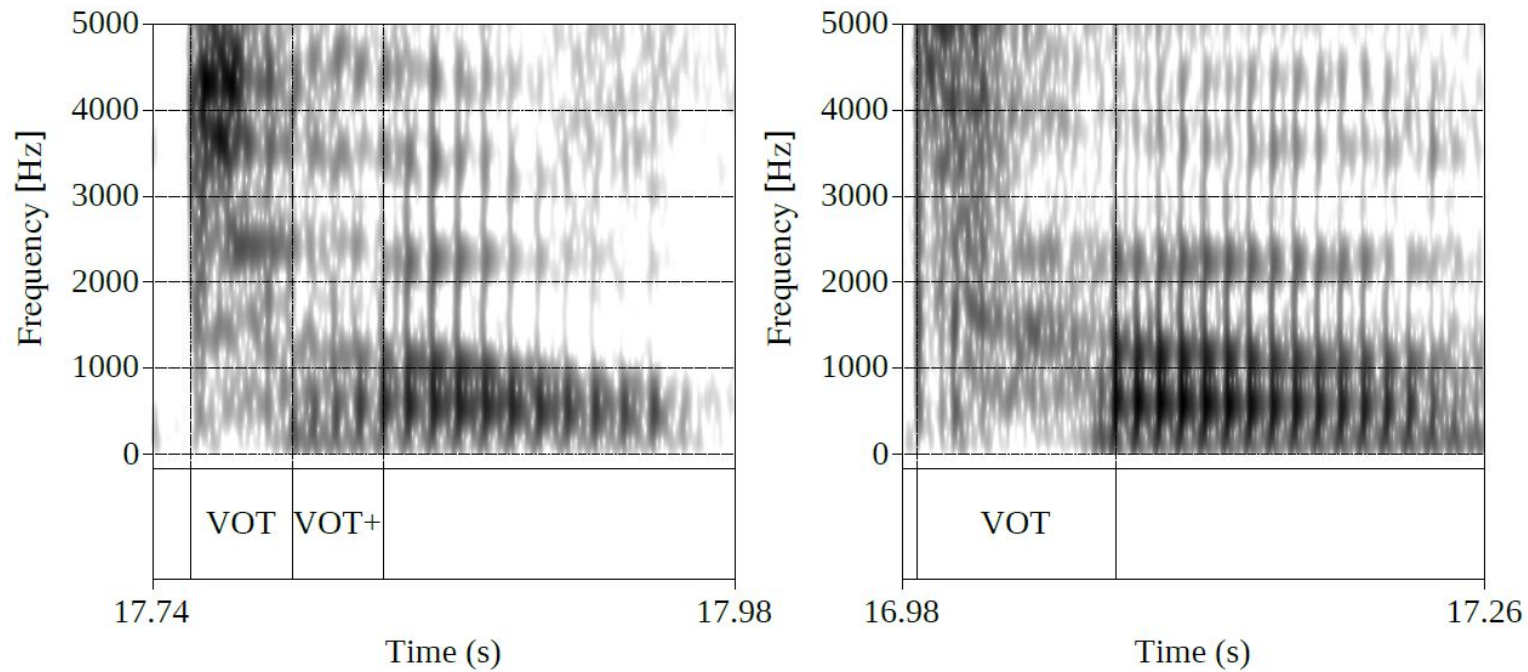

Supplement: Supplementary file 1 [file 1]
