# Supplementary material
Source: publisher figshare collection journal article supplement (https://asha.figshare.com/articles/dataset/_/6484001)
Supplement: Supplementary file 2 [file 1]

## Supplemental Material S4

## Online Questionnaire

## Sexual orientation

*Sexual self-identification*<sup>+</sup> (Kinsey-like scale; Kinsey, Pomeroy, & Martin, 1948)

<sup>†</sup>We adapted the original Kinsey-scale for our study with regard to the scale range and the description for every single scale point.

Item: “Regarding my sexual orientation I identify as...”

| 1                  | 2          | 3               | 4                           | 5                    | 6                  | 7                       |
|--------------------|------------|-----------------|-----------------------------|----------------------|--------------------|-------------------------|
| Exclusively<br>gay | Mainly gay | Somewhat<br>gay | Equally gay<br>and straight | Somewhat<br>straight | Mainly<br>straight | Exclusively<br>straight |

*Sexual orientation towards men and women (more objectifiable measure)*

“How often have you experienced...?”

|                                      | Never    | Very<br>seldom | Seldom   | From time<br>to time | Often    | Very<br>often | Always   |
|--------------------------------------|----------|----------------|----------|----------------------|----------|---------------|----------|
|                                      | <i>1</i> | <i>2</i>       | <i>3</i> | <i>4</i>             | <i>5</i> | <i>6</i>      | <i>7</i> |
| ...sexual fantasies with men         | ○        | ○              | ○        | ○                    | ○        | ○             | ○        |
| ...sexual fantasies with women       | ○        | ○              | ○        | ○                    | ○        | ○             | ○        |
| ...romantic attraction towards men   | ○        | ○              | ○        | ○                    | ○        | ○             | ○        |
| ...romantic attraction towards women | ○        | ○              | ○        | ○                    | ○        | ○             | ○        |
| ...physical attraction towards men   | ○        | ○              | ○        | ○                    | ○        | ○             | ○        |
| ...physical attraction towards women | ○        | ○              | ○        | ○                    | ○        | ○             | ○        |
| ...sexual interaction with men       | ○        | ○              | ○        | ○                    | ○        | ○             | ○        |
| ...sexual interaction with women     | ○        | ○              | ○        | ○                    | ○        | ○             | ○        |

## Masculinity/femininity

*Traditional Masculinity–Femininity Scale* (TMF by Kachel, Steffens, & Niedlich, 2016).

|                                                                       | Very<br>masculine     |                       |                       |                       |                       |                       | Very<br>feminine      |
|-----------------------------------------------------------------------|-----------------------|-----------------------|-----------------------|-----------------------|-----------------------|-----------------------|-----------------------|
|                                                                       | <i>1</i>              | <i>2</i>              | <i>3</i>              | <i>4</i>              | <i>5</i>              | <i>6</i>              | <i>7</i>              |
| I consider myself...                                                  | <input type="radio"/> |
| Ideally, I would like to be...                                        | <input type="radio"/> |
| Traditionally, my interests<br>would be regarded as...                | <input type="radio"/> |
| Traditionally, my attitudes<br>and beliefs would be<br>regarded as... | <input type="radio"/> |
| Traditionally, my behavior<br>would be regarded as...                 | <input type="radio"/> |
| Traditionally, my outer<br>appearance would be<br>regarded as...      | <input type="radio"/> |

*German Extended Personal Attributes Questionnaire Masculinity-Scale* (GEPAQ-M by Runge, Frey, Gollwitzer, Helmreich, & Spence, 1981) is available upon request from the copyright owner.

*German Extended Personal Attributes Questionnaire Femininity-Scale* (GEPAQ-F by Runge, Frey, Gollwitzer, Helmreich, & Spence, 1981) is available upon request from the copyright owner.

## Psycho-social identification

*Collective Self-Esteem Scale* (CSES by Luhtanen & Crocker, 1992) is available upon request from the copyright owners.

## Gender-role self-concept during childhood

*Childhood Gender Nonconformity Scale*<sup>+</sup> (CGNS, see Rieger, Linsenmeier, Gygax, & Bailey, 2008).

<sup>+</sup>We adapted the original CGNS scale for our study with regard to scale range (1–5), description of the scale points, and a few wordings. Moreover, we added the last item to our scale.

|                                                                            | I strongly disagree   |                       | Partly agree          |                       | I strongly agree      |
|----------------------------------------------------------------------------|-----------------------|-----------------------|-----------------------|-----------------------|-----------------------|
|                                                                            | <i>1</i>              | <i>2</i>              | <i>3</i>              | <i>4</i>              | <i>5</i>              |
| I was a feminine boy.                                                      | <input type="radio"/> |
| As a child I was called a sissy by my parents and/or peers.                | <input type="radio"/> |
| As a child I sometimes wished I had been born a girl rather than a boy.    | <input type="radio"/> |
| As a child I preferred playing with girls rather than boys.                | <input type="radio"/> |
| As a child I often felt that I had more in common with girls than boys.    | <input type="radio"/> |
| As a child I usually avoided masculine clothing.                           | <input type="radio"/> |
| As a child I did not like competitive sports such as soccer or basketball. | <input type="radio"/> |
| *As a child I behaved like a typical boy.                                  | <input type="radio"/> |

\*Items with asterisks had to be recoded (1 to 5, 2 to 4, 3 to 3, 4 to 2, 5 to 1).

### Group affiliation (Affiliation to gay and straight men)

Item: “Please mark the picture that describes your relationship to the group of gay/straight men best.”

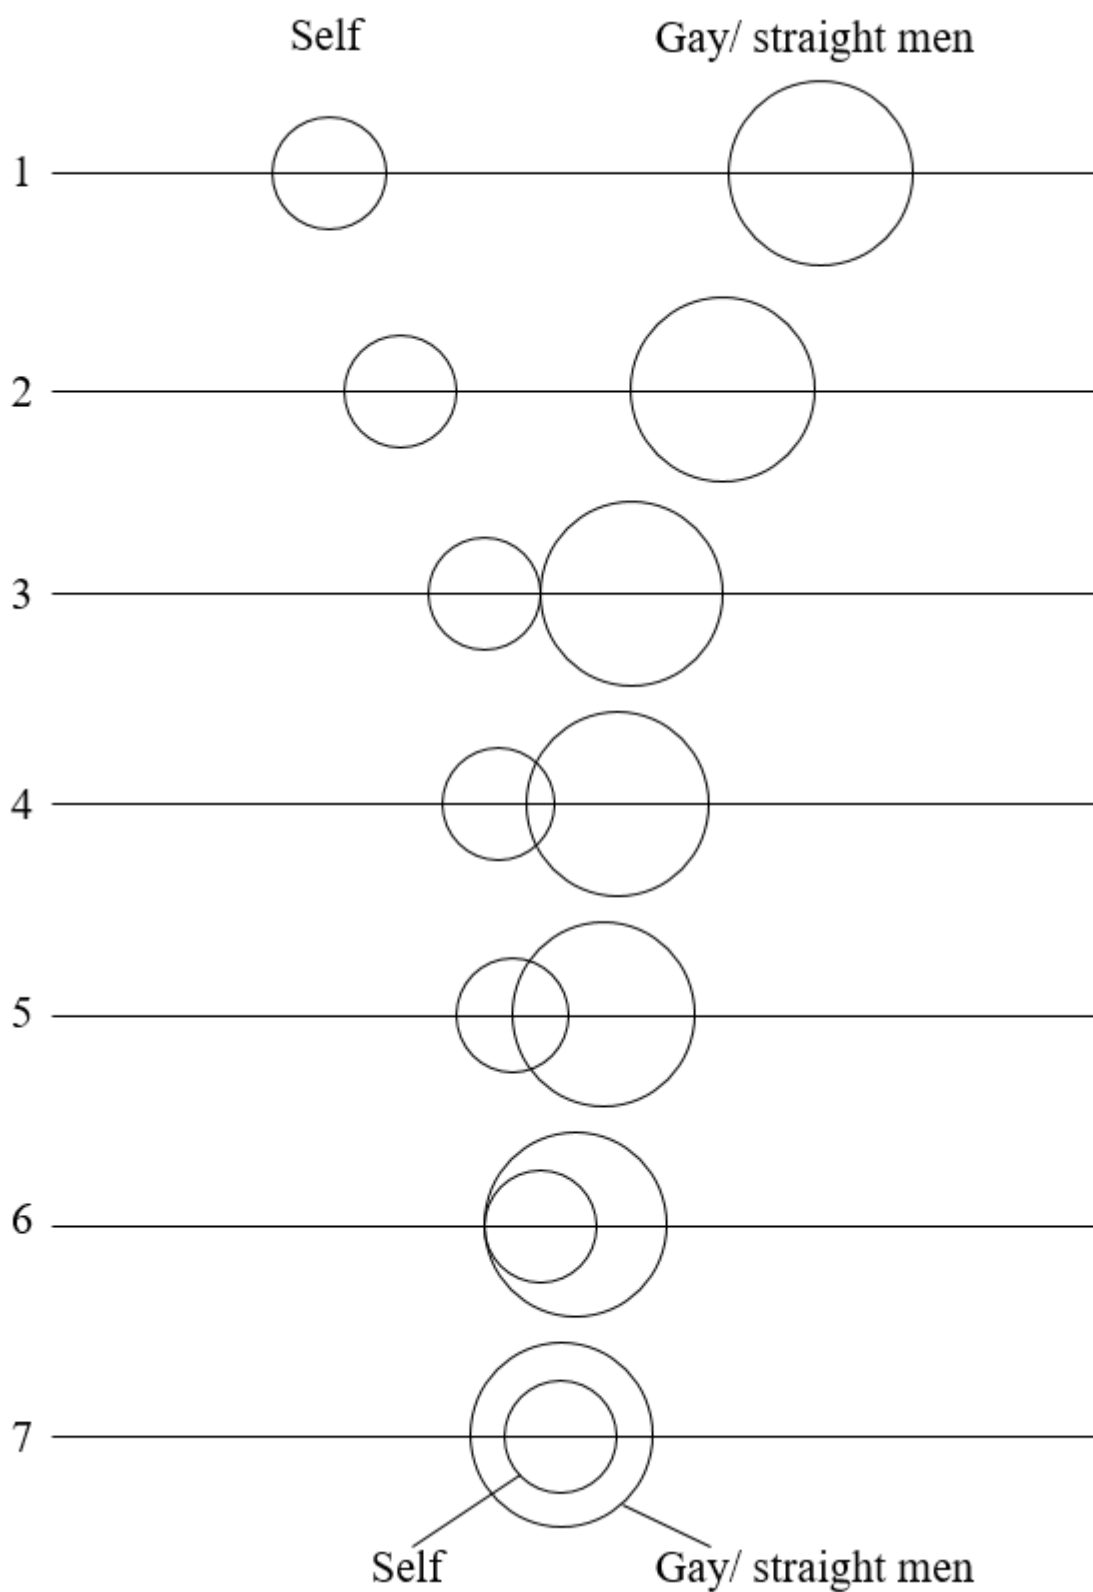

## Social environment

### -Present social environment

*Current contact to gay men* (based on Hodson, Harry, & Mitchell, 2009).

Item: “Frequency of contact to gay men.”

| 1     | 2            | 3      | 4         | 5     | 6          | 7      |
|-------|--------------|--------|-----------|-------|------------|--------|
| Never | Almost never | Seldom | Sometimes | Often | Very often | Always |

*Current contact to straight men*

Item: “Frequency of contact to straight men.”

| 1     | 2            | 3      | 4         | 5     | 6          | 7      |
|-------|--------------|--------|-----------|-------|------------|--------|
| Never | Almost never | Seldom | Sometimes | Often | Very often | Always |

*Gender distribution of friends*

Item: “My circle of friends consists of...”

| 1             | 2               | 3                      | 4                        | 5                    | 6             | 7           |
|---------------|-----------------|------------------------|--------------------------|----------------------|---------------|-------------|
| ...women only | ...women mainly | ...somewhat more women | ...women and men equally | ...somewhat more men | ...men mainly | ...men only |

*Sexual orientation of male friends*

Item: “My female circle of friends consists of...”

| 1                | 2                  | 3                        | 4                                | 5                             | 6                       | 7                     |
|------------------|--------------------|--------------------------|----------------------------------|-------------------------------|-------------------------|-----------------------|
| ... gay men only | ... gay men mainly | ...somewhat more gay men | ... gay and straight men equally | ...somewhat more straight men | ... straight men mainly | ... straight men only |

**-Childhood social environment**

*Contact to girls during childhood*

Item: “Contact to girls.”

| 1     | 2           | 3      | 4                 | 5     | 6          | 7      |
|-------|-------------|--------|-------------------|-------|------------|--------|
| Never | Very seldom | Seldom | From time to time | Often | Very often | Always |

*Contact to boys during childhood*

Item: “Contact to boys.”

| 1     | 2           | 3      | 4                 | 5     | 6          | 7      |
|-------|-------------|--------|-------------------|-------|------------|--------|
| Never | Very seldom | Seldom | From time to time | Often | Very often | Always |

## Voice self-assessment

|                                                          | Strong<br>rejection   |                       |                       |                       |                       |                       | Strongly<br>agreement |
|----------------------------------------------------------|-----------------------|-----------------------|-----------------------|-----------------------|-----------------------|-----------------------|-----------------------|
|                                                          | <i>1</i>              | <i>2</i>              | <i>3</i>              | <i>4</i>              | <i>5</i>              | <i>6</i>              | <i>7</i>              |
| I believe other people think I speak in a masculine way. | <input type="radio"/> |
| I think I speak stereotypically straight.                | <input type="radio"/> |
| *In other people’s opinion, I speak stereotypically gay. | <input type="radio"/> |
| *Other people think I speak in a feminine way.           | <input type="radio"/> |
| *In my opinion, I speak stereotypically gay.             | <input type="radio"/> |
| I think I speak masculine.                               | <input type="radio"/> |

\*Items with asterisks had to be recoded (1 to 7, 2 to 6, 3 to 5, 4 to 4, 5 to 3, 6 to 2, 7 to 1).

### Coming-out measures (Data collected for non-straight men only)



*Concealment motivation* (subscale of the Lesbian, Gay, and Bisexual Identity Scale by Mohr & Kendra, 2011)

[illegible]

*Perceived discrimination experiences* (based on Steffens, Bergert, & Heinecke, 2010; Williams, Yu, Jackson, & Anderson, 1997)

|                                                                    | Never                 | Once                  | Rarely                | Sometimes             | Often                 |
|--------------------------------------------------------------------|-----------------------|-----------------------|-----------------------|-----------------------|-----------------------|
|                                                                    | <i>1</i>              | <i>2</i>              | <i>3</i>              | <i>4</i>              | <i>5</i>              |
| Other people act as if I was uncomfortable to them.                | <input type="radio"/> |
| I was insulted or called names.                                    | <input type="radio"/> |
| I feared something could happen to me.                             | <input type="radio"/> |
| Compared to other people I felt like I was treated unfair.         | <input type="radio"/> |
| I was harassed.                                                    | <input type="radio"/> |
| I received poorer service in bars or restaurants.                  | <input type="radio"/> |
| In shops I was ignored or treated unfriendly.                      | <input type="radio"/> |
| I was threatened.                                                  | <input type="radio"/> |
| Other people treated me with less respect.                         | <input type="radio"/> |
| Other people ignored me.                                           | <input type="radio"/> |
| I was treated less politely compared to other people.              | <input type="radio"/> |
| I experienced disadvantages during renting a flat.                 | <input type="radio"/> |
| I lost my job or did not got one, because I’m lesbian or bisexual. | <input type="radio"/> |

## Explicit speech stereotypes

|    |                   | Only gay |   |   |   |   |   | Only straight |
|----|-------------------|----------|---|---|---|---|---|---------------|
|    |                   | 1        | 2 | 3 | 4 | 5 | 6 | 7             |
| 1  | High              | o        | o | o | o | o | o | o             |
| 2  | Slow              | o        | o | o | o | o | o | o             |
| 3  | Variable          | o        | o | o | o | o | o | o             |
| 4  | Loud              | o        | o | o | o | o | o | o             |
| 5  | In dialect        | o        | o | o | o | o | o | o             |
| 6  | Succinct          | o        | o | o | o | o | o | o             |
| 7  | Unclear           | o        | o | o | o | o | o | o             |
| 8  | Bright            | o        | o | o | o | o | o | o             |
| 9  | Non-nasal         | o        | o | o | o | o | o | o             |
| 10 | Blunt             | o        | o | o | o | o | o | o             |
| 11 | Hoarse            | o        | o | o | o | o | o | o             |
| 12 | Soft              | o        | o | o | o | o | o | o             |
| 13 | Lots of pauses    | o        | o | o | o | o | o | o             |
| 14 | Rather asking     | o        | o | o | o | o | o | o             |
| 15 | Shrill            | o        | o | o | o | o | o | o             |
| 16 | Strong            | o        | o | o | o | o | o | o             |
| 17 | Lots of resonance | o        | o | o | o | o | o | o             |
| 18 | Clear             | o        | o | o | o | o | o | o             |
| 19 | Hard              | o        | o | o | o | o | o | o             |
| 20 | Breathy           | o        | o | o | o | o | o | o             |

|    |                 | Only<br>gay |   |   |   |   | Only<br>straight |   |
|----|-----------------|-------------|---|---|---|---|------------------|---|
|    |                 | 1           | 2 | 3 | 4 | 5 | 6                | 7 |
| 21 | Dark            | o           | o | o | o | o | o                | o |
| 22 | Rather stating  | o           | o | o | o | o | o                | o |
| 23 | Strained        | o           | o | o | o | o | o                | o |
| 24 | Fast            | o           | o | o | o | o | o                | o |
| 25 | Slack           | o           | o | o | o | o | o                | o |
| 26 | Squeaky         | o           | o | o | o | o | o                | o |
| 27 | Raspy           | o           | o | o | o | o | o                | o |
| 28 | Sedate          | o           | o | o | o | o | o                | o |
| 29 | Staccato        | o           | o | o | o | o | o                | o |
| 30 | Monotonous      | o           | o | o | o | o | o                | o |
| 31 | Weak            | o           | o | o | o | o | o                | o |
| 32 | Stagnant        | o           | o | o | o | o | o                | o |
| 33 | Standard German | o           | o | o | o | o | o                | o |
| 34 | Nasal           | o           | o | o | o | o | o                | o |
| 35 | Little pauses   | o           | o | o | o | o | o                | o |
| 36 | Stretched       | o           | o | o | o | o | o                | o |
| 37 | Low             | o           | o | o | o | o | o                | o |
| 38 | Fluid           | o           | o | o | o | o | o                | o |
| 39 | Quiet           | o           | o | o | o | o | o                | o |
| 40 | Pointed         | o           | o | o | o | o | o                | o |

## References

- Hodson, G., Harry, H., & Mitchell, A. (2009). Independent benefits of contact and friendship on attitudes toward homosexuals among authoritarians and highly identified heterosexuals. *European Journal of Social Psychology*, 39, 509–525.
- Kachel, S., Steffens, M. C., & Niedlich, C. (2016). Traditional masculinity and femininity: Validation of a new scale assessing gender roles. *Frontiers in Psychology*, 7, Article 956. <https://doi.org/10.3389/fpsyg.2016.00956>
- Kinsey, A., Pomeroy, W., & Martin, C. (1948). *Sexual behavior in the human male*. Philadelphia, PA: W. B. Saunders Co.
- Luhtanen, R., & Crocker, J. (1992). A Collective Self-Esteem Scale: Self-evaluation of one’s social identity. *Personality and Social Psychology Bulletin*, 18, 302–318.
- Mohr, J. J., & Kendra, M. S. (2011). Revision and extension of a multidimensional measure of sexual minority identity: The Lesbian, Gay, and Bisexual Identity Scale. *Journal of Counseling Psychology*, 58, 234–245.
- Rieger, G., Linsenmeier, J. A. W., Gygax, L., & Bailey, J. M. (2008). Sexual orientation and childhood gender nonconformity: Evidence from home videos. *Developmental Psychology*, 44, 46–58.
- Runge, T. E., Frey, D., Gollwitzer, P. E., Helmreich, R. L., & Spence, J. T. (1981). Masculine (instrumental) and feminine (expressive) traits: A comparison between students in the United States and West Germany. *Journal of Cross-Cultural Psychology*, 12, 142–162.
- Steffens, M. C., Bergert, M., & Heinecke, S. (2010). *Doppelt diskriminiert oder gut integriert? Zur Lebenssituation von Lesben und Schwulen mit Migrationshintergrund (Discriminated twice or well integrated? The living situation of lesbians and gay men with a migration background)*. Berlin, Germany: LSVD. Retrieved from [http://www.migrationsfamilien.de/pdf/Studie\\_Jena.pdf](http://www.migrationsfamilien.de/pdf/Studie_Jena.pdf)
- Williams, D. R., Yu, Y., Jackson, J. S., & Anderson, N. B. (1997). Racial differences in physical and mental health: Socioeconomic status, stress, and discrimination. *Journal of Health Psychology*, 2, 335–351.
