# Supplementary material
Source: publisher figshare collection journal article supplement (https://asha.figshare.com/articles/dataset/_/6484001)

**Supplemental Material S2.** Schematic sagittal view of the isolation plate and nasal and oral microphones.

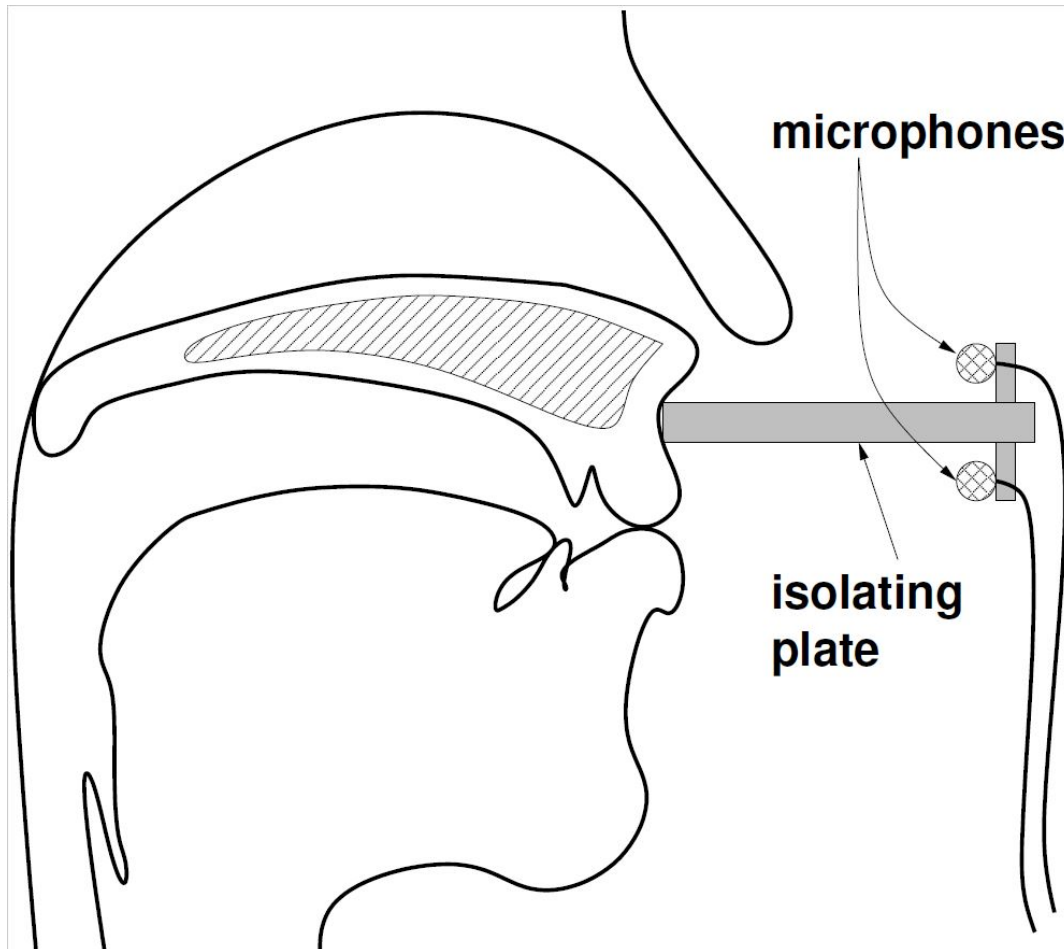

Supplement: Supplementary file 3 [file 1]
