# Supplementary material
Source: publisher figshare collection journal article supplement (https://asha.figshare.com/articles/dataset/_/6484001)
Supplement: Supplementary file 4 [file 1]

**Supplemental Material S1.** Distribution of speakers regarding sexual orientation on Kinsey-like scale (modified version from Kinsey, Pomeroy, & Martin, 1948) in Sessions 1 and 2.

| Kinsey-like score            | Number per cell |           |
|------------------------------|-----------------|-----------|
|                              | Session 1       | Session 2 |
| 1 - Exclusively gay          | 17              | 15        |
| 2 - Mainly gay               | 8               | 4         |
| 3 - Somewhat gay             | 2               | 0         |
| 4 - Equally gay and straight | 1               | 2         |
| 5 - Somewhat straight        | 0               | 0         |
| 6 - Mainly straight          | 7               | 5         |
| 7 - Exclusively straight     | 19              | 13        |

**Reference**

Kinsey, A., Pomeroy, W., & Martin, C. (1948). *Sexual behavior in the human male*. Philadelphia, PA: W. B. Saunders Co.
